# Supplementary material for: A global estimate of monthly vegetation and soil fractions from spatio-temporally adaptive spectral mixture analysis during 2001–2022
Source: Copernicus journal article supplement (doi:10.5194/essd-2023-341), 2023-10-10
Supplement: Supplementary file 1 [file essd-2023-341-supplement.pdf]

---

## Supplementary for

# A global estimate of monthly vegetation and soil fractions from spatio-temporally adaptive spectral mixture analysis during 2001-2022

Qiangqiang Sun<sup>1</sup>, Ping Zhang<sup>2</sup>, Xin Jiao<sup>1</sup>, Xin Lin<sup>1</sup>, Wenkai Duan<sup>3</sup>, Su Ma<sup>4</sup>, Qidi Pan<sup>1</sup>, Lu Chen<sup>1</sup>, Yongxiang Zhang<sup>1</sup>, Shucheng You<sup>5</sup>, Shunxi Liu<sup>6</sup>, Jinmin Hao<sup>1</sup>, Hong Li<sup>7\*</sup>, Danfeng Sun<sup>1,8\*</sup>

<sup>1</sup>College of Land Science and Technology, China Agricultural University, Beijing, 100193, China

<sup>2</sup>National Geomatics Center of China, Beijing, China.

<sup>3</sup>China Agricultural University Library, China Agricultural University, Beijing, 100193, China

<sup>4</sup>Chinese Research Academy of Environmental Sciences, Beijing, China

<sup>5</sup>Land Satellite Remote Sensing Application Center, Ministry of Natural Resources, Beijing, China

<sup>6</sup>China Land Survey and Planning Institute, Ministry of Natural Resources, Beijing, China

<sup>7</sup>Institute of plant nutrition and resources, Beijing Academy of Agriculture and Forestry Sciences, Beijing, China

<sup>8</sup>Technology innovation Center of land engineering, Ministry of Natural Resources, Beijing, China

*Correspondence to:* Danfeng Sun ([sundf@cau.edu.cn](mailto:sundf@cau.edu.cn)); Hong Li ([lih5176@126.com](mailto:lih5176@126.com))

---

27 **Supplementary Methods**

28 **Seasonal Mann-Kendall test**

29 The seasonal Mann-Kendall test is commonly applied to identify trends for seasonal environmental data of interest that is  
30 available as time series for which the time intervals between adjacent observations are less than one year (i.e., daily, weekly,  
31 and monthly sequences) (Hirsch et al. 1982). Letting the sequence  $X$  consists of a complete seasonal record of  $n$  year that  
32 includes  $m$  seasons per year, the  $X$  can be expressed by

33 
$$X = \begin{bmatrix} x_{11} & x_{12} & \cdots & x_{1m} \\ x_{21} & x_{22} & \cdots & x_{2m} \\ \vdots & \vdots & & \vdots \\ x_{n1} & x_{n2} & \cdots & x_{nm} \end{bmatrix}$$

34 The null hypothesis,  $H_0$ , is that the  $n$  observations come from each of  $m$  seasons with independent realizations are identically  
35 distributed. While the alternative hypothesis ( $H_A$ ) of a two-sided test is that data presents a monotonic trend. The Seasonal  
36 Mann-Kendall test statistic for the  $g$  th season is

37 
$$S_g = \sum_{i=1}^{n-1} \sum_{j=i+1}^n \text{sgn}(x_{jg} - x_{ig}), g = 1, 2, \dots, m$$

38 where

39 
$$\text{sgn}(\theta) = \begin{cases} 1 & \text{if } \theta > 0 \\ 0 & \text{if } \theta = 0 \\ -1 & \text{if } \theta < 0 \end{cases}$$

40  $S_g$  is asymptotically normally distributed, thus the mean of  $S_g$  is  $E[S_g] = 0$ , and the variance is

41 
$$\text{Var}[S_g] = \left\{ n(n-1)(2n+5) - \sum_{j=1}^p t_j(t_j-1)(2t_j+5) \right\} / 18$$

42 where  $n$  is the number of years of each season,  $p$  is the number of tied groups for data  $x_{ig}$ ,  $i=1,2,\dots,n$ , in season  $g$ , and  $t_j$   
43 is the number of data points in the  $j$ th tied group. The seasonal Mann-Kendall test statistic is

44

$$S = \sum_{g=1}^m S_g$$

45 which is also asymptotically normally distributed where  $E[S] = 0$ , thus the variance of  $S$  is

46

$$Var[S] = \sum_{g=1}^m Var[S_g]$$

47 And the statistic  $S$  is approximately normal distributed provided that the following  $Z$ -transformation is employed,

48

$$Z = \begin{cases} \frac{S - 1}{\sqrt{Var[S]}} & \text{if } S > 0 \\ 0 & \text{if } S = 0 \\ \frac{S + 1}{\sqrt{Var[S]}} & \text{if } S < 0 \end{cases}$$

49 For a given  $\alpha$ -significance level, the original null hypothesis ( $H_0$ ) is unacceptable if  $|Z| \geq Z_{1-\alpha/2}$ . This implies a

50 significantly upward or downward trend in the series.

51 Theil-Sen estimator is a method of robust linear regression by selecting the median value of the slope of all lines passing

52 through the paired points. It is also known as Sen's slope estimation (Sen and Kumar, 1968). Here, we detect slope of

53 fractions according to seasonal Sen's method. For sequence  $X$  consisting of a complete seasonal record of  $n$  year that54 includes  $m$  seasons per year, a set of linear slopes is calculated as,

55

$$d_{g,j,k} = \frac{x_{g,j} - x_{g,k}}{j - k}$$

56 For each  $x_{i,j}, x_{i,k}$  pair  $i = 1, 2, \dots, m$ ,  $1 \leq k < j \leq n$ , where  $n$  is length of  $g$ th season. and seasonal Sen's slope is then

57 calculated as the median from all slopes.

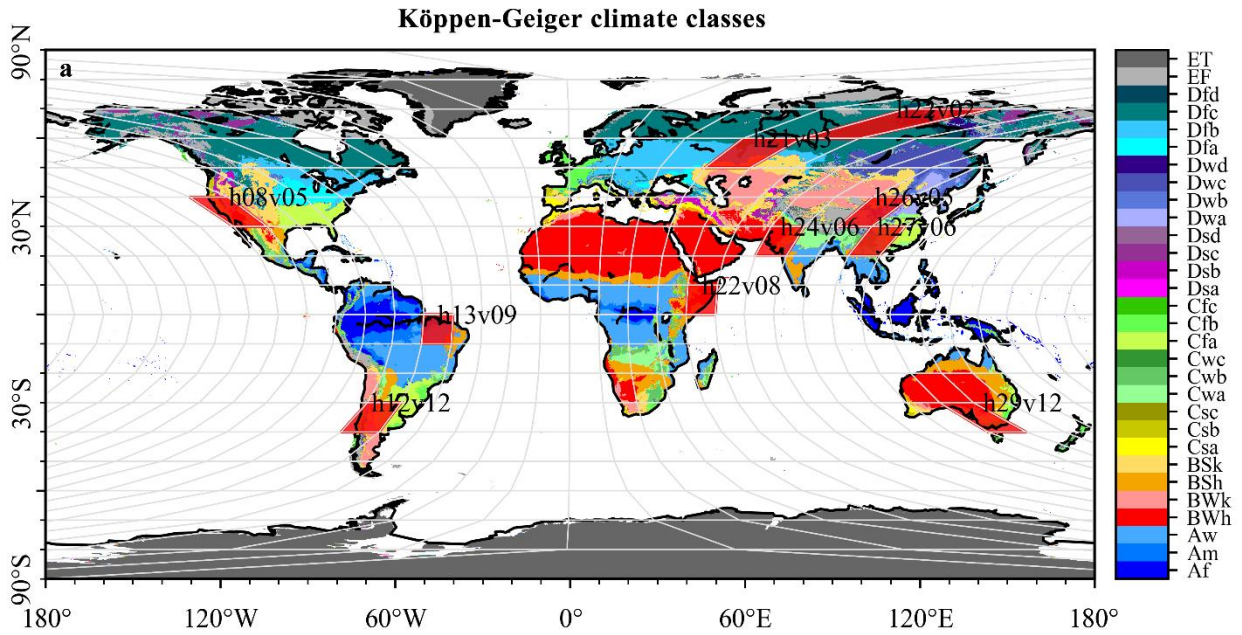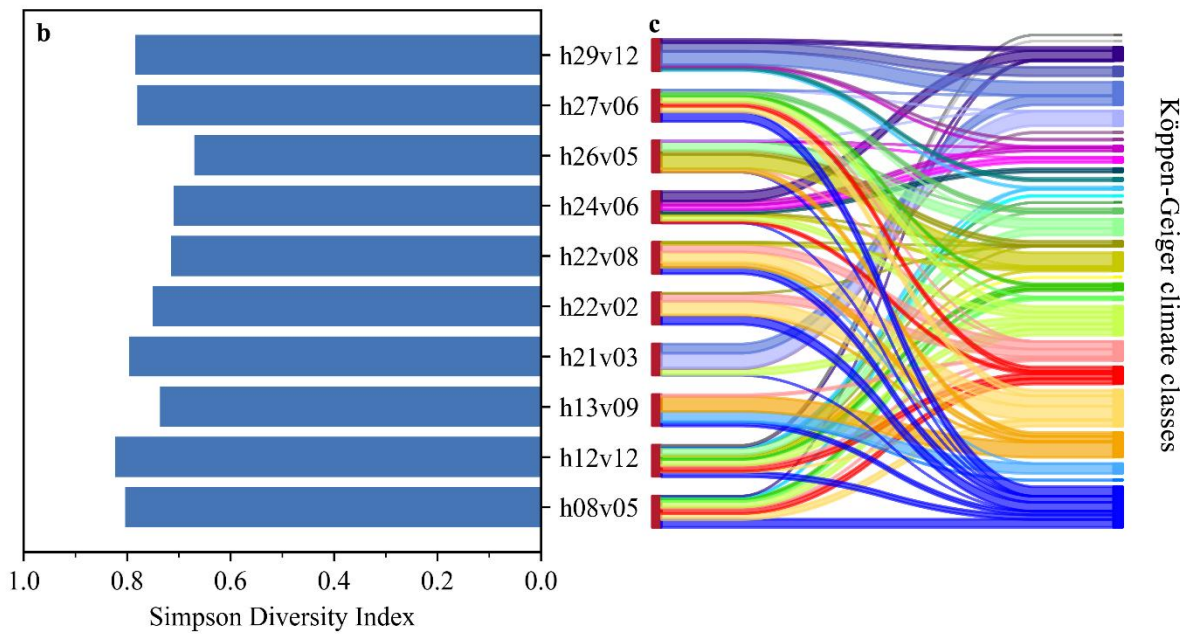

58  
59 **Figure S1: The typical MODIS Grids for endmembers selection.** a, 10 selected MODIS grids (i.e., h08v05, h12v12, h13v09, h16v01,  
60 h21v03, h22v02, h22v08, h24v06, h26v05, h27v06, h29v12), distributed in 6 continents, were colored with red. b, The Simpson's  
61 Diversity Index (D) greater than 0.6 for selected MODIS grids. c, the correspondence between selected MODIS grids and Köppen-  
62 Geiger climate classification, indicating each Köppen-Geiger climate classification was represented by selected MODIS grids.

63  
64  
65  
66  
67  
68

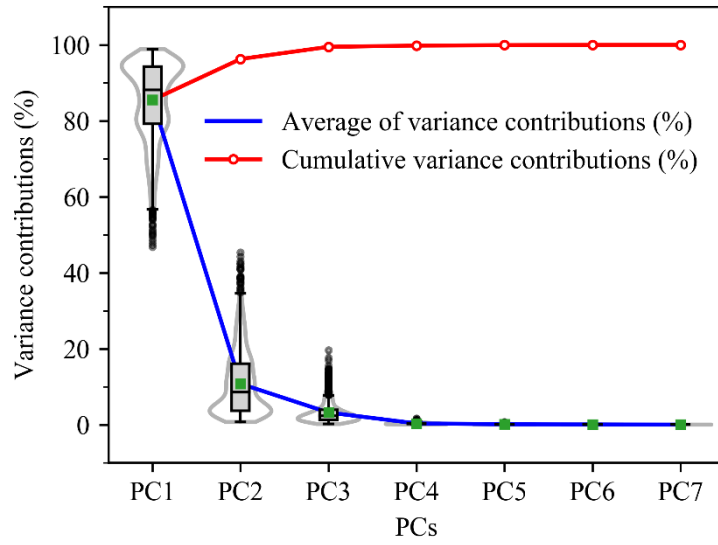

69

70

71

72

73

**Figure S2: Variance contributions (%) of principal component transformation for each monthly MODIS reflectance image across 10 grids (n=2280).** The violin plot and box plot revealed value distribution of each PC. The blue and red lines represented average of variance contributions and cumulative variance contributions of each PC, respectively. The cumulative contribution of the top three PCs has exceeded 99%.

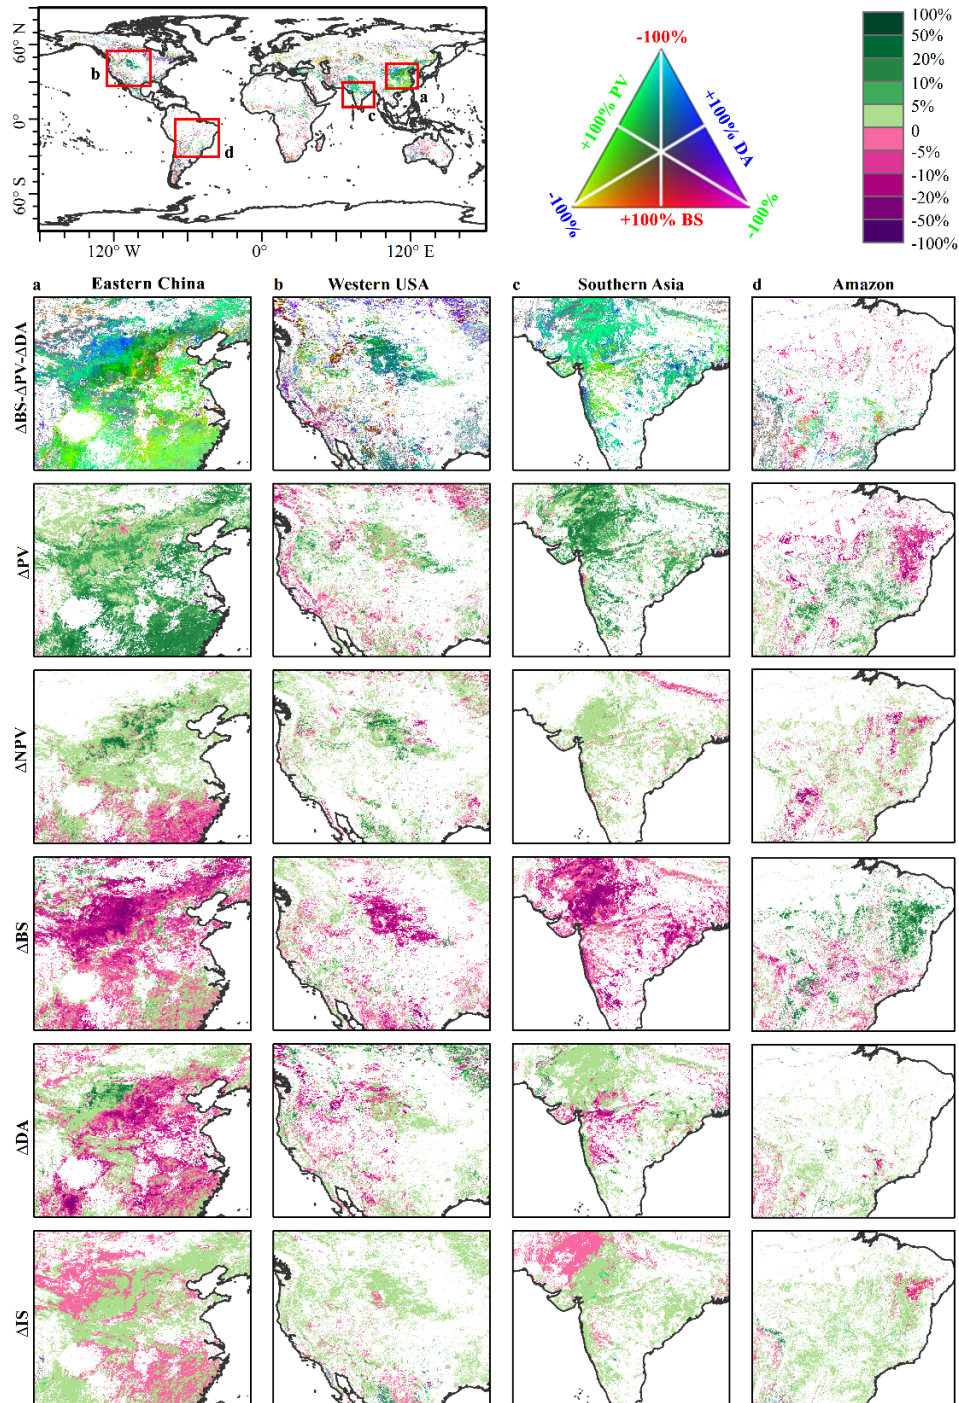

74

75 **Fig. S3 Regional detailed subsets of changes for endmember fractions.** From top to bottom, the first row represented composed  
 76 images with  $\Delta BS$ ,  $\Delta PV$ , and  $\Delta DA$ . the second to sixth row displayed the change magnitude (%) in each pixel for estimated endmembers,  
 77 i.e.,  $\Delta PV$ ,  $\Delta NVP$ ,  $\Delta BS$ ,  $\Delta DA$ , and  $\Delta IS$ . Pixels showing a statistically significant trend ( $n = 228$ , Seasonal Mann–Kendall test,  $P < 0.05$ )  
 78 for either endmember are depicted on the change map. a-d, Eastern China, Western USA, Southern Asia, and Amazon.

**Table S1 Selected typical MODIS grids for endmember selection and corresponding timing for each endmember.**

|        | <b>Girds</b>                       | <b>Zones</b> | <b>IS</b> | <b>NPV</b> | <b>PV</b> | <b>BS</b> | <b>DA</b> |
|--------|------------------------------------|--------------|-----------|------------|-----------|-----------|-----------|
| h08v05 | West Coast of North America        |              | 2016-12   | 2005-02    | 2010-07   | 2005-02   | 2019-10   |
|        |                                    |              | 2009-12   | 2005-03    | 2012-07   | 2005-03   | 2007-10   |
|        |                                    |              | 2017-01   | 2010-03    | 2013-07   | 2010-03   | 2003-10   |
| h12v12 | West Coast of South America        |              | 2003-06   | 2007-09    | 2007-01   | 2007-09   | 2003-04   |
|        |                                    |              | 2016-05   | 2011-09    | 2016-02   | 2011-09   | 2009-04   |
|        |                                    |              | 2005-08   | 2008-09    | 2014-02   | 2008-09   | 2013-04   |
| h13v09 | Amazon Basin                       |              | -         | 2019-10    | 2016-01   | 2019-10   |           |
|        |                                    |              | -         | 2013-10    | 2018-02   | 2013-10   |           |
|        |                                    |              | -         | 2016-10    | 2004-03   | 2016-10   |           |
| h21h03 | Western Europe -Central Asia       |              | 2018-02   | 2007-10    | 2014-09   | 2017-10   |           |
|        |                                    |              | 2011-02   | 2016-10    | 2013-09   | 2016-10   |           |
|        |                                    |              | 2005-03   | 2016-10    | 2004-09   | 2009-10   |           |
| h22h02 | Russian Far East                   |              | 2003-01   |            | 2019-06   | 2019-06   | 2006-03   |
|        |                                    |              | 2009-12   |            | 2018-06   | 2018-06   | 2011-03   |
|        |                                    |              | 2010-12   |            | 2019-07   | 2019-07   | 2012-03   |
| h22h08 | East Coast of North Africa         |              | -         |            | -         | 2005-07   | 2013-04   |
|        |                                    |              | -         |            | -         | 2006-10   | 2018-05   |
|        |                                    |              | -         |            | -         | 2016-06   | 2019-10   |
| h24v06 | South Asia                         |              | -         |            | 2018-07   | 2018-07   |           |
|        |                                    |              | -         |            | 2004-07   | 2004-07   |           |
|        |                                    |              | -         |            | 2008-07   | 2008-07   |           |
| h26v05 | Northwest of Qinghai Tibet Plateau |              | 2008-01   |            | 2013-07   | 2007-03   | 2007-09   |
|        |                                    |              | 2019-02   |            | 2006-07   | 2007-11   | 2017-09   |
|        |                                    |              | 2008-02   |            | 2010-07   | 2003-11   | 2008-10   |
| h27v06 | Southwest China                    |              | -         |            | 2013-09   | 2007-11   |           |
|        |                                    |              | -         |            | 2006-08   | 2019-10   |           |
|        |                                    |              | -         |            | 2017-07   | 2004-10   |           |
| h29v12 | South Australia                    |              | -         | 2007-01    | 2019-08   | 2017-05   |           |
|        |                                    |              | -         | 2003-01    | 2016-09   | 2011-05   |           |
|        |                                    |              | -         | 2006-12    | 2016-08   | 2012-05   |           |

80

81

82

83

84

85

86

87

88

89

90

91

**Table S2 692 combination models.** These models include two-endmember model, three-endmember model and four-endmember model.

| Models                         | combinations      |
|--------------------------------|-------------------|
| two-endmember model<br>(88)    | PV+BS (16)        |
|                                | PV+DA (8)         |
|                                | PV+IS (8)         |
|                                | BS+DA (8)         |
|                                | BS+IS (8)         |
|                                | DA+IS (4)         |
|                                | PV+NPV (12)       |
|                                | BS+NPV(12)        |
|                                | DA+NPV(6)         |
|                                | IS+NPV(6)         |
| three-endmember model<br>(252) | PV+BS+DA (32)     |
|                                | PV+BS+IS (32)     |
|                                | PV+DA+IS (16)     |
|                                | BS+DA+IS(16)      |
|                                | PV+BS+NPV (48)    |
|                                | PV+DA+NPV (24)    |
|                                | PV+IS+NPV (24)    |
|                                | BS+DA+NPV (24)    |
|                                | BS+IS+NPV(24)     |
| DA+IS+NPV (12)                 |                   |
| four-endmember model<br>(352)  | PV+BS+DA+IS (64)  |
|                                | PV+BS+DA+NPV (96) |
|                                | PV+BS+IS+NPV (96) |
|                                | PV+DA+IS+NPV(48)  |
|                                | BS+DA+IS+NPV (48) |



94

**Table S3 Evaluation of estimated five vegetation and soil components against GLCVRD reference dataset.**

|               | <b>ME</b> | <b>MAE</b> | <b>RMSE</b> | <b>R<sup>2</sup></b> |
|---------------|-----------|------------|-------------|----------------------|
| <b>PV+NPV</b> | -0.100    | 0.118      | 0.149       | 0.592                |
| <b>BS</b>     | 0.047     | 0.075      | 0.109       | 0.710                |
| <b>DA</b>     | 0.047     | 0.050      | 0.065       | 0.156                |
| <b>IS</b>     | 0.008     | 0.008      | 0.020       | 0.792                |

95

96  
97

**Table S4 Global and regional fractional endmembers dynamics.** The initial area, gain area, loss area and net change area are calculated for globe and five climate zones, i.e., tropical, arid, temperate, cold, and polar.

| Zones     | Endmembers | Initial area       | Loss               | Gain               | Net change area    |
|-----------|------------|--------------------|--------------------|--------------------|--------------------|
|           |            | (km <sup>2</sup> ) | (km <sup>2</sup> ) | (km <sup>2</sup> ) | (km <sup>2</sup> ) |
| Globe     | PV         | 49861610.43        | -637802.76         | 1573227.20         | 935424.44          |
|           | NPV        | 15128296.27        | -564426.41         | 345275.53          | -219150.87         |
|           | BS         | 46994793.90        | -1381062.00        | 866955.99          | -514106.02         |
|           | DA         | 32708319.15        | -887176.16         | 660346.40          | -226829.76         |
|           | IS         | 22247774.92        | -114679.83         | 139342.04          | 24662.21           |
| Tropical  | PV         | 16018642.05        | -236558.32         | 231221.99          | -5336.33           |
|           | NPV        | 2217754.40         | -109780.44         | 24544.40           | -85236.04          |
|           | BS         | 3830525.28         | -197155.41         | 319038.83          | 121883.42          |
|           | DA         | 2001545.61         | -61499.28          | 29922.32           | -31576.96          |
|           | IS         | 133822.65          | -3499.33           | 3765.24            | 265.91             |
| Temperate | PV         | 9393375.78         | -78191.98          | 413284.59          | 335092.61          |
|           | NPV        | 2417754.40         | -154026.78         | 52210.12           | -101816.66         |
|           | BS         | 3530525.28         | -316382.59         | 102279.47          | -214103.11         |
|           | DA         | 3001545.61         | -79412.55          | 62801.35           | -16611.20          |
|           | IS         | 133822.65          | -9419.53           | 6857.89            | -2561.64           |
| Arid      | PV         | 7302896.73         | -166255.40         | 431469.49          | 265214.10          |
|           | NPV        | 2753166.01         | -158937.90         | 149897.07          | -9040.83           |
|           | BS         | 34208215.02        | -577137.23         | 402055.35          | -175081.89         |
|           | DA         | 6055362.59         | -301342.53         | 226780.57          | -74561.96          |
|           | IS         | 3234817.92         | -79628.12          | 73098.70           | -6529.42           |
| Cold      | PV         | 15661149.01        | -153482.53         | 488284.80          | 334802.27          |
|           | NPV        | 6556417.74         | -140497.42         | 114025.71          | -26471.71          |
|           | BS         | 3772331.10         | -278401.74         | 38748.72           | -239653.02         |
|           | DA         | 17529802.86        | -438961.80         | 334040.19          | -104921.61         |
|           | IS         | 9580056.20         | -17785.65          | 54029.72           | 36244.07           |
| Polar     | PV         | 1485546.86         | -3314.53           | 8966.33            | 5651.80            |
|           | NPV        | 1183203.72         | -1183.88           | 4598.24            | 3414.36            |
|           | BS         | 1653197.22         | -11985.03          | 4833.61            | -7151.42           |
|           | DA         | 4120062.48         | -5960.00           | 6801.97            | 841.96             |
|           | IS         | 9165255.50         | -4347.20           | 1590.50            | -2756.70           |

98
